# Supplementary material for: Poor correlation between large-scale environmental flow violations and freshwater biodiversity: implications for water resource management and water planetary boundary
Source: Copernicus journal article supplement (doi:10.5194/hess-2022-87), 2022-04-05
Supplement: Supplementary file 1 [file hess-2022-87-supplement.pdf]

# Supplementary Information

## S.1 Existing Assumption

Bunn and Arthington (2002) proposed four guiding principles to substantiate the influence of flow alterations on stream biodiversity: 1) The physical habitat is primarily determined by the flow, which in turn determines the biotic composition, 2) Flow variations directly influenced the evolution of aquatic species, 3) Viability of an aquatic population is determined by the longitudinal and lateral connectivity of the river systems, and 4) Alteration of flow regimes facilitates invasive, exotic species. These four principles and other basin-scale evidence (Leigh and Datry, 2017; Mathers et al., 2019; Sarremejane et al., 2020; Zeiringer et al., 2018) suggest that freshwater biodiversity has an inverse relationship with EF violations. According to this assumption, as the EF violation increases, the associated freshwater biodiversity will decrease. Furthermore, the EF-biodiversity relationship is assumed to be scale-independent, meaning that its nature does not change with spatial scale. A graphical representation of this assumption is given in Fig. S1. When the assumption is valid, a curve fitted against the freshwater biodiversity and EF violation should yield a negative gradient (Fig. S1 a) and the median value of biodiversity (either relative value or absolute value) of all violated basins should be significantly lower than the non-violated counterpart (Fig. S1 b). If either of these conditions are not met, then the assumption could be considered invalid.

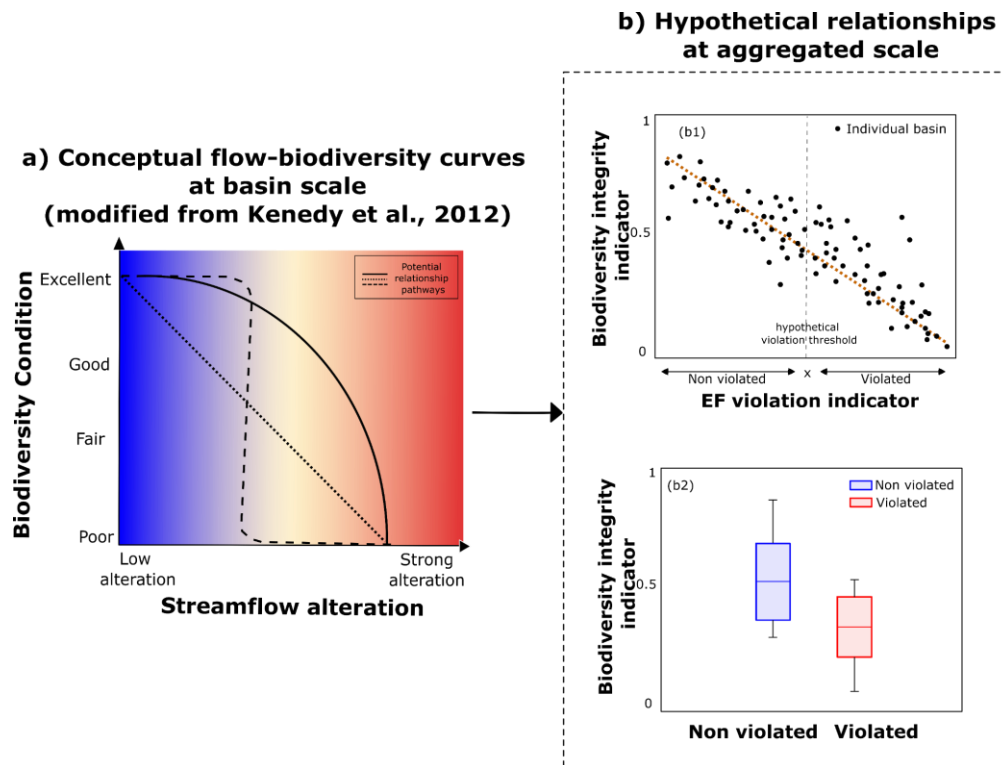

Fig. S1 a) Conceptual flow-biodiversity curves at basin scale modified from (Kendy et al., 2012) and b) hypothetical graphs of the simplest EF-biodiversity relationship (linear) at aggregated scale.

## S.2 Data requirement

We use the following global datasets in this study: Streamflow data, Environmental Flow Envelopes, Freshwater fish richness data, Freshwater fish facets, Subbasin boundaries. Each of the datasets selected are described and justified in Supplementary Table S1

Table S1: Data sources, description, and summary of all data used in this study

| Datasets                   | Description                                                                                                                                                                                                                                                        |
|----------------------------|--------------------------------------------------------------------------------------------------------------------------------------------------------------------------------------------------------------------------------------------------------------------|
| Aquatic fish richness data | <p><b>Data Source:</b> Tedesco et al. (2017)</p> <p><b>Temporal Resolution:</b> Temporal aggregate from data compiled from reports between 1960 and 2014</p> <p><b>Spatial Resolution (extend):</b> 30 arc second (3119 drainage basins; ~80% of Earth's land)</p> |

|                        |                                                                                                                                                                                                                                                                                                                                                                                                                                                                                                                                                                                                                                                                                                                                                                                                                                                                                                                                                                                                                                                                        |
|------------------------|------------------------------------------------------------------------------------------------------------------------------------------------------------------------------------------------------------------------------------------------------------------------------------------------------------------------------------------------------------------------------------------------------------------------------------------------------------------------------------------------------------------------------------------------------------------------------------------------------------------------------------------------------------------------------------------------------------------------------------------------------------------------------------------------------------------------------------------------------------------------------------------------------------------------------------------------------------------------------------------------------------------------------------------------------------------------|
|                        | <p><b>Description:</b> Fish richness data was compiled and processed from n 1436 published papers, books, grey literature and web-based sources published between 1960 and 2014.</p>                                                                                                                                                                                                                                                                                                                                                                                                                                                                                                                                                                                                                                                                                                                                                                                                                                                                                   |
| Freshwater fish facets | <p><b>Data Source:</b> Su et al. (2021)</p> <p><b>Temporal Resolution:</b> Representative of 2015</p> <p><b>Spatial Resolution (extend):</b> Basin scale (2465 drainage basins)</p> <p><b>Description:</b> Each facet indicates the change in the corresponding biodiversity component compared to the 18<sup>th</sup> century (roughly pre-industrial era). The taxonomic facets measure the occurrence of fish in a riverine system. Whereas functional facets are calculated using the morphological characteristics of each species that are linked to the feeding and locomotive functions which in turn relates to larger ecosystem functions like food web controlling and nutrition transport. On the other hand, the phylogenetic facets measure the total length of branches linking all species from the assemblage on the phylogenetic tree. The richness component of the three categories calculate the diversity among the assemblage whereas the dissimilarity accounts for the difference between each pair of fish assemblage in the same realm.</p> |
| EFE                    | <p><b>Data Source:</b> Virkki et al. (2022)</p> <p><b>Temporal Resolution:</b> Monthly (Pre-industrial: 1801-1860)</p> <p><b>Spatial Resolution (extend):</b> Aggregated to Level 5 HydroBASIN (global)</p> <p><b>Description:</b></p>                                                                                                                                                                                                                                                                                                                                                                                                                                                                                                                                                                                                                                                                                                                                                                                                                                 |
| Streamflow             | <p><b>Data Source:</b> ISIMIP (2020)</p> <p><b>Temporal Resolution:</b> Monthly (Pre-industrial: 1801-1860, Historical: 1976-2005)</p> <p><b>Spatial Resolution (extend):</b> Aggregated to Level 5 HydroBASIN (global)</p> <p><b>Description:</b> The streamflow data was obtained from Inter-Sectoral Impact Model Intercomparison Project (ISIMIP) simulation phase 2b outputs of global daily discharge (aggregated to monthly for this study); available at <a href="https://esg.pik-potsdam.de">https://esg.pik-potsdam.de</a>. ISIMIP is a community-driven climate-impact modelling initiative that offers a consistent framework for cross-sectoral, cross-scale modelling of the impacts of climate change. The streamflow was obtained for four Global Hydrological Models (GHM) (H08, Lpjml, PCR-GlobWB, WaterGap2) and four Global Circulation Models (GCM) (GFDL-EMS2M, HADGEM2-es, IPSL-CM5A-Ir, MICROC5) .</p>                                                                                                                                         |

|                      |                                                                                                                                                                                                                                                                                                                                                                                                                                                                                                                                                                                                                                 |
|----------------------|---------------------------------------------------------------------------------------------------------------------------------------------------------------------------------------------------------------------------------------------------------------------------------------------------------------------------------------------------------------------------------------------------------------------------------------------------------------------------------------------------------------------------------------------------------------------------------------------------------------------------------|
| Sub-basin boundaries | <p><b>Data Source:</b> HydroSHEDS (Lehner and Grill, 2013)</p> <p><b>Temporal Range:</b> NA</p> <p><b>Spatial Resolution (extend):</b> Level 5 HydroBASIN (global)</p> <p><b>Description:</b> HydroBASINs are the watershed boundaries derived from the hydrographic information from HydroSHED Database, developed with a goal of providing a global coverage of hierarchically nested sub-basins at various scales. The HydroBASIN catchment nesting follows the Pfafstetter coding system (Verdin and Verdin, 1999) and offers 12 levels (level 1 - course and level 12 - detailed) of sub-basin classification globally</p> |
|----------------------|---------------------------------------------------------------------------------------------------------------------------------------------------------------------------------------------------------------------------------------------------------------------------------------------------------------------------------------------------------------------------------------------------------------------------------------------------------------------------------------------------------------------------------------------------------------------------------------------------------------------------------|

Table S2. Characteristics of biodiversity indicators

| Biodiversity indicator          | Relative measure | Gridded value | Biota data derived |
|---------------------------------|------------------|---------------|--------------------|
| Fish Richness (FiR)             |                  | X             | X                  |
| Taxonomic Richness (TR)         | X                |               | X                  |
| Functional Richness (FR)        | X                |               | X                  |
| Phylogenetic Richness (PR)      | X                |               | X                  |
| Taxonomic Dissimilarity (TD)    | X                |               | X                  |
| Functional Dissimilarity (FD)   | X                |               | X                  |
| Phylogenetic Dissimilarity (PD) | X                |               | X                  |

### S.3 Environmental flow estimation methods

This study uses five EF estimation methods

Table S3. Environmental flow estimation methods

| EF method                                   | Flow regime classification                                                                                                                                                                                                              | EFR calculation                                                                                                                          | Other details                                                                                                                                           |
|---------------------------------------------|-----------------------------------------------------------------------------------------------------------------------------------------------------------------------------------------------------------------------------------------|------------------------------------------------------------------------------------------------------------------------------------------|---------------------------------------------------------------------------------------------------------------------------------------------------------|
| Smakhtin (Smakhtin et al., 2004)            | Highly variable flow regimes ( $Q_{90} < 10\%$ MAF)<br>Intermediate variable flow ( $10\% \text{ MAF} < Q_{90} < 20\% \text{ MAF}$ )<br>Low variable flow ( $20\% \text{ MAF} < Q_{90} < 30\% \text{ MAF}$ )                            | High: $Q_{90} + 0.2 \cdot \text{MAF}$<br><br>Intermediate: $Q_{90} + 0.15 \cdot \text{MAF}$<br><br>Low: $Q_{90} + 0.07 \cdot \text{MAF}$ | <ul style="list-style-type: none"> <li>Stable EFRs throughout the year</li> <li>No inter annual variability</li> </ul>                                  |
| Tennant (Tennant, 1976)                     | High-flow season ( $\text{MMF} > \text{MAF}$ )<br>Low-flow season ( $\text{MMF} \leq \text{MAF}$ )                                                                                                                                      | High: $0.4 \cdot \text{MAF}$<br><br>Low: $0.2 \cdot \text{MAF}$                                                                          |                                                                                                                                                         |
| Q90-Q50 (Pastor et al., 2014)               | High-flow season ( $\text{MMF} > \text{MAF}$ )<br>Low-flow season ( $\text{MMF} \leq \text{MAF}$ )                                                                                                                                      | High: Q50<br><br>Low: Q90                                                                                                                | <ul style="list-style-type: none"> <li>Based on annual flow quantiles</li> </ul>                                                                        |
| Tessmann (Tessmann, 1979)                   | High ( $\text{MMF} > 40\% \text{MAF}$ and $40\% \text{MMF} > 40\% \text{MAF}$ )<br>Intermediate ( $\text{MMF} > 40\% \text{MAF}$ and $40\% \text{MMF} = 40\% \text{MAF}$ )<br>Low-flow months ( $\text{MMF} \leq 40\% \text{ of MAF}$ ) | High: $0.4 \cdot \text{MMF}$<br><br>Intermediate: $0.4 \cdot \text{MMF}$<br><br>Low-flow months: $1 \cdot \text{MMF}$                    | <ul style="list-style-type: none"> <li>Consider inter annual variability</li> </ul>                                                                     |
| Variable Monthly Flow (Pastor et al., 2014) | High ( $\text{MMF} > 80\% \text{ of MAF}$ )<br>Intermediate ( $\text{MMF}$ is $40\text{--}80\% \text{ of MAF}$ )<br>Low-flow months ( $\text{MMF} \leq 40\% \text{ of MAF}$ )                                                           | High: $0.3 \cdot \text{MMF}$<br><br>Intermediate: $0.45 \cdot \text{MMF}$<br>Low-flow months: $0.6 \cdot \text{MMF}$                     | <ul style="list-style-type: none"> <li>Consider inter annual variability</li> <li>Can be aggregated and validated at basin and global scales</li> </ul> |

#### S.4 Catchment classification based on flow variability

The catchments were classified based on the criteria provided by Smakhtin et al. (2004) The categorization criteria are given in Table S3.

Table S4. Criteria for different flow variability regime category

| Category                               | Criteria                                     | Characteristics                                                                         |
|----------------------------------------|----------------------------------------------|-----------------------------------------------------------------------------------------|
| Highly variable flow regimes           | $Q_{90} < 10\% \text{MAF}$                   | receive most of the annual flow as floods                                               |
| Intermediate variable flow regimes     | $10\% \text{MAF} < Q_{90} < 20\% \text{MAF}$ | <Fill>                                                                                  |
| Low variable flow regimes              | $20\% \text{MAF} < Q_{90} < 30\% \text{MAF}$ | <Fill>                                                                                  |
| Stable catchments with high base flows | $Q_{90} > 30\% \text{MAF}$                   | year round steady high baseflow; relatively less increase in flow during wetter periods |

Note: MAF = Mean Annual Flow

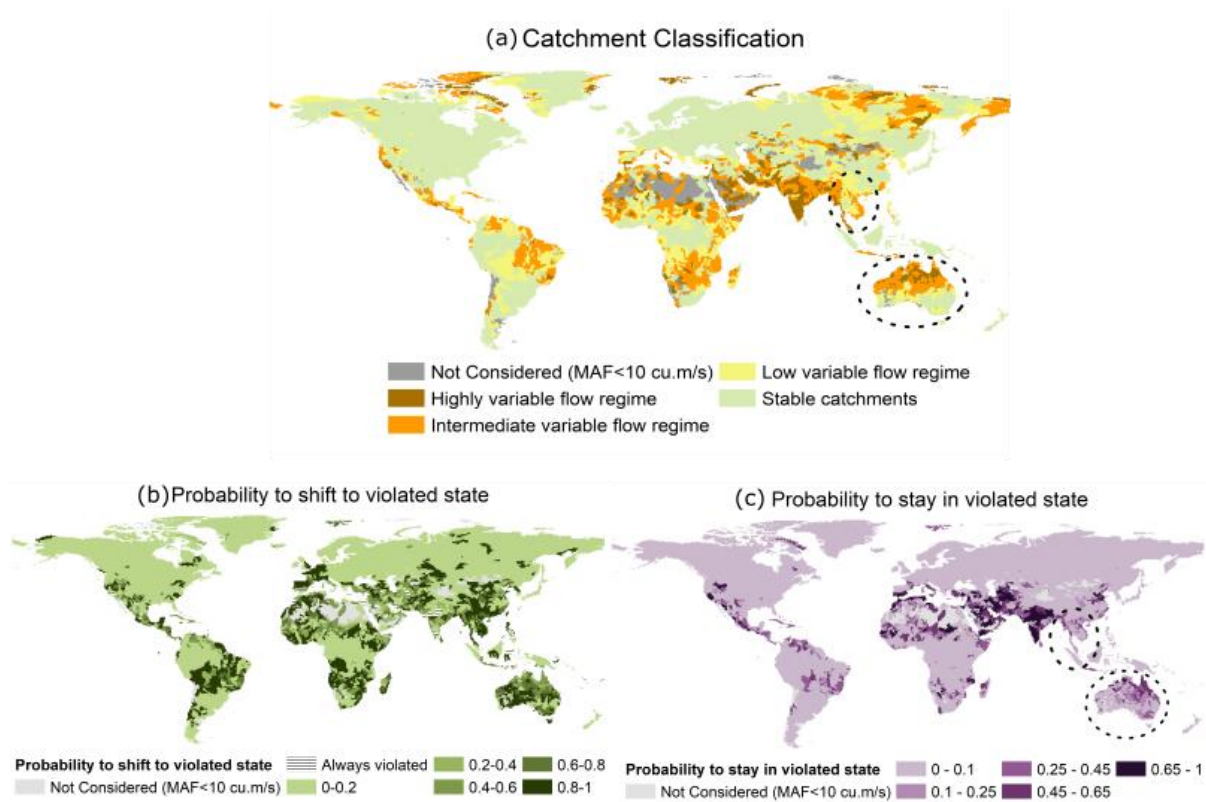

Fig. S2 (a) Catchment classification based on flow variability, EF violation maps for (b) P.shift and (c) P.stay with stable regions with high P.shift and low P.stay marked using dotted circle (eg. Australia)

## S.5 Aggregation methods

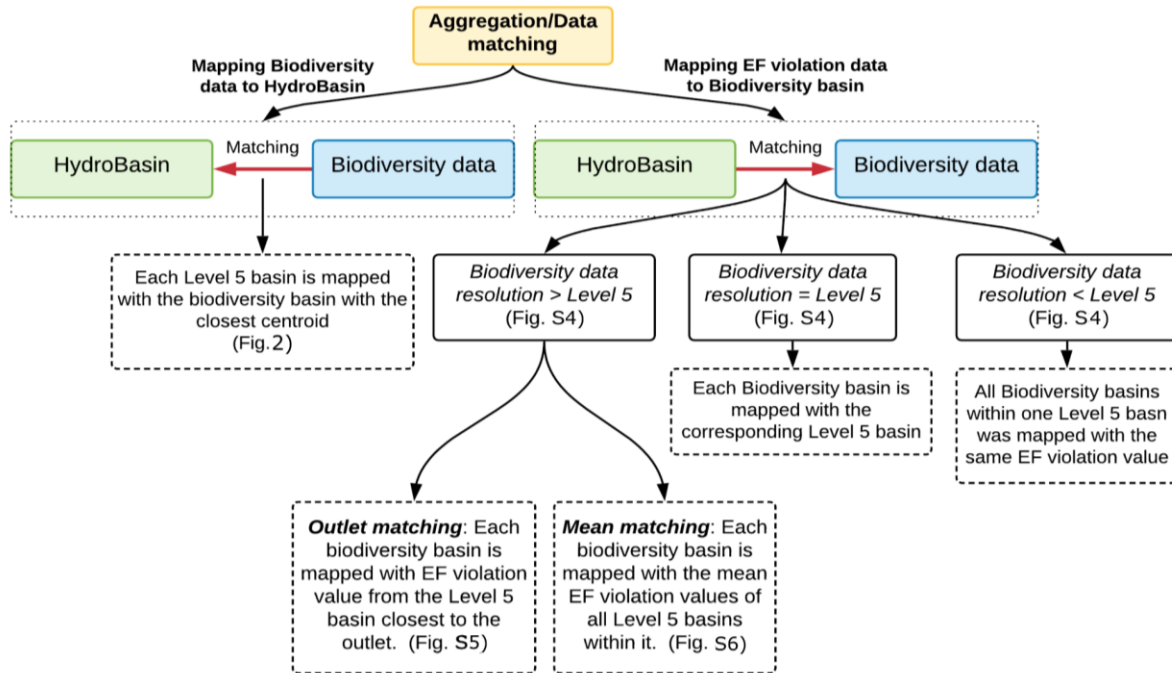

Fig. S3. Flow chart of various data mapping techniques used to match the spatial resolution of EF violation and biodiversity data.

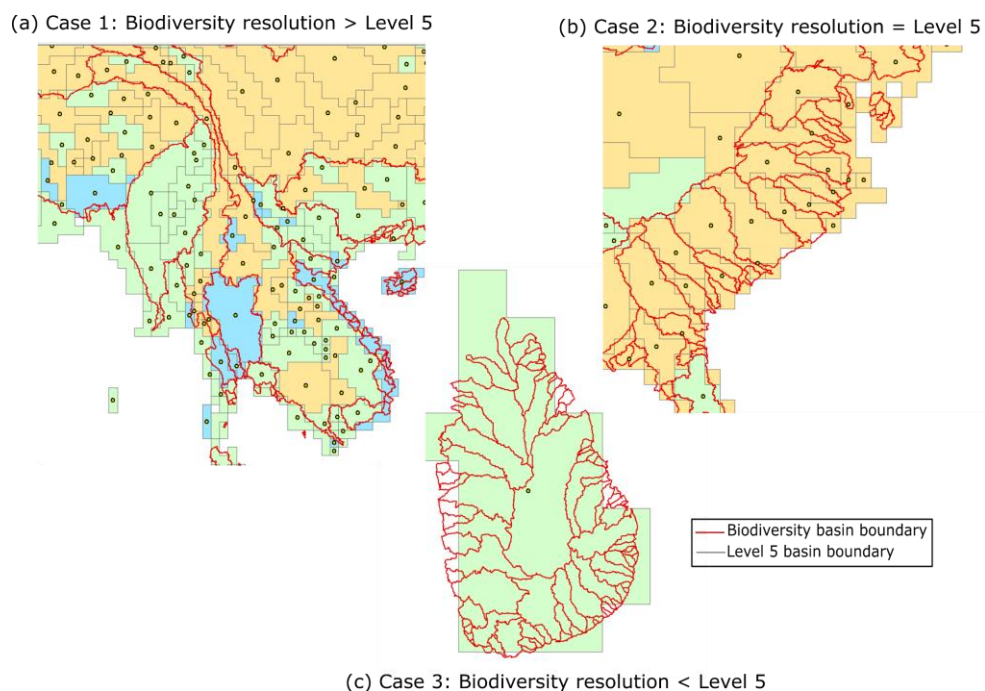

Fig. S4 (a-c) Spatial scale discrepancies between Level 5 HydroBASIN (EF violation) and biodiversity basin (Fish facets data)

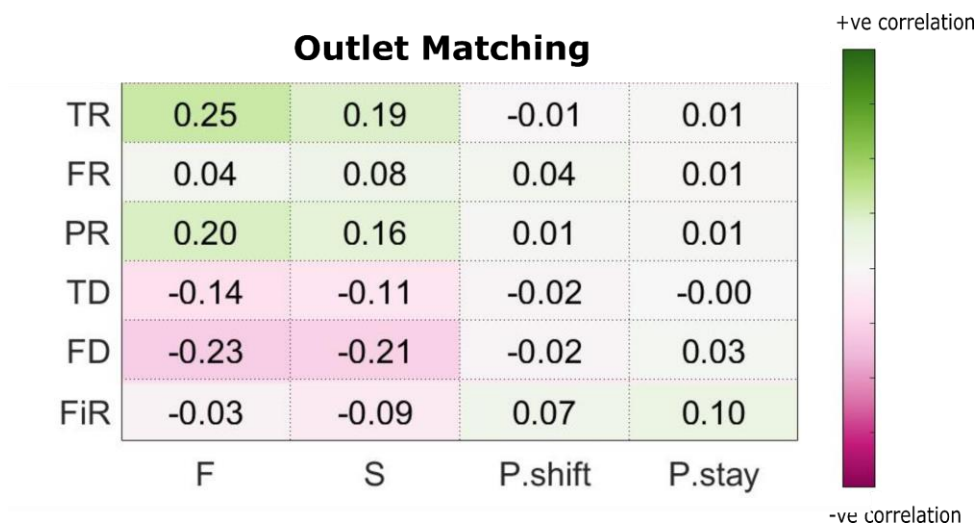

Fig. S5 R value of relationship between EF violation indices and Biodiversity indicators spatially matched using Outlet matching method



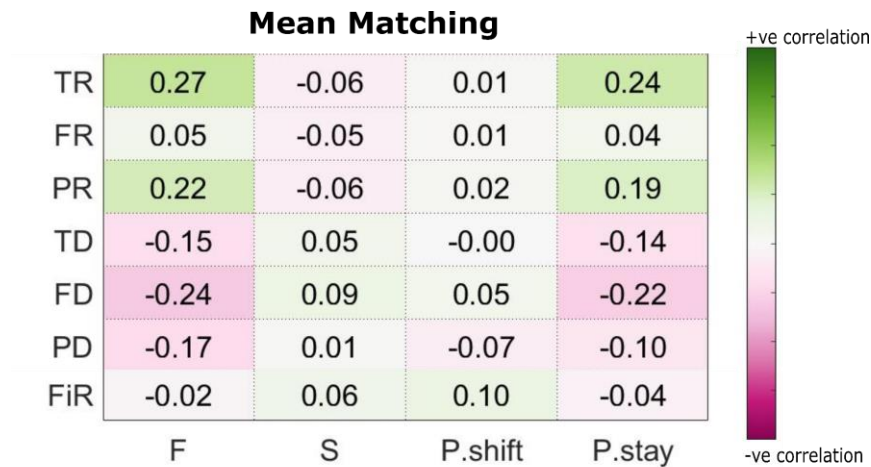

Fig. S6 R value of relationship between EF violation indices and Biodiversity indicators spatially matched using Mean matching method

## S.6 G200 biome classification

WWF's Global 200 project analyzed global patterns of biodiversity to identify a set of the Earth's terrestrial, freshwater, and marine ecoregions that harbor exceptional biodiversity and are representative of its ecosystems. This process yielded 238 ecoregions--the Global 200--comprising 142 terrestrial, 53 freshwater, and 43 marine priority ecoregions. In this study we used 7 main freshwater ecoregion categories which is a coarse aggregation of the 53 freshwater ecoregions identified in Global 200 project.

## S.7 Freshwater Major Habitat Types (MHT) classification

Freshwater Ecoregions of the World (FEOW), provides a new global biogeographic regionalization of the Earth's freshwater biodiversity, virtually all freshwater habitats on Earth (<https://databasin.org/datasets/0b6963be65074bca9306b1b6f05149d2/>). The FEOW are categorised based on the Major Habitat Type (MHT) to study the aquatic behavior in similar types of habitat (Fig. S7) (Abell et al., 2008).

# FEOW -MHTs

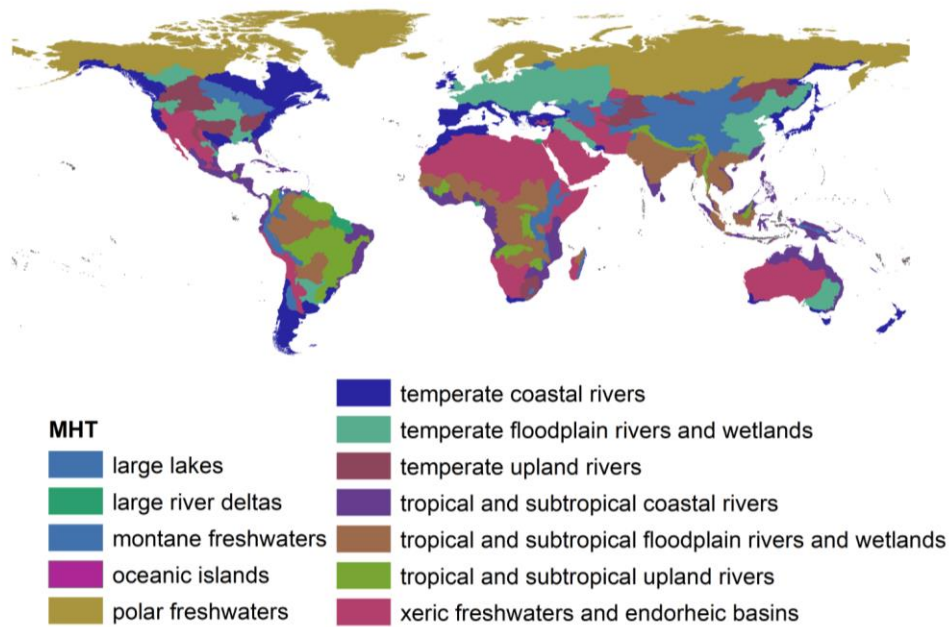

Fig. S7 Map of Major Habitat Types (freshwater)

Table S5. correlation between EF violation indices and freshwater biodiversity indicators for different freshwater MHT (N.B. \* marks the statistically significant relationships ( $p < 0.05$ ))

| Freshwater Major Habitat Type (MHT) | Correlation matrix                                                                                                                                                                                                                                                                                                                                                                                                                                                                                                           | Total basin in MHT |         |        |  |  |    |   |  |  |  |    |  |  |   |  |    |   |  |  |  |    |   |  |  |  |    |   |  |  |  |     |  |   |   |   |  |   |   |         |        |     |
|-------------------------------------|------------------------------------------------------------------------------------------------------------------------------------------------------------------------------------------------------------------------------------------------------------------------------------------------------------------------------------------------------------------------------------------------------------------------------------------------------------------------------------------------------------------------------|--------------------|---------|--------|--|--|----|---|--|--|--|----|--|--|---|--|----|---|--|--|--|----|---|--|--|--|----|---|--|--|--|-----|--|---|---|---|--|---|---|---------|--------|-----|
| Large lakes                         | <div>large lakes</div> <table><tr><td>TR</td><td></td><td></td><td></td><td></td></tr><tr><td>FR</td><td>*</td><td></td><td></td><td></td></tr><tr><td>PR</td><td></td><td></td><td>*</td><td></td></tr><tr><td>TD</td><td>*</td><td></td><td></td><td></td></tr><tr><td>FD</td><td>*</td><td></td><td></td><td></td></tr><tr><td>PD</td><td>*</td><td></td><td></td><td></td></tr><tr><td>FiR</td><td></td><td>*</td><td>*</td><td>*</td></tr><tr><td></td><td>F</td><td>S</td><td>P.shift</td><td>P.stay</td></tr></table> | TR                 |         |        |  |  | FR | * |  |  |  | PR |  |  | * |  | TD | * |  |  |  | FD | * |  |  |  | PD | * |  |  |  | FiR |  | * | * | * |  | F | S | P.shift | P.stay | 109 |
| TR                                  |                                                                                                                                                                                                                                                                                                                                                                                                                                                                                                                              |                    |         |        |  |  |    |   |  |  |  |    |  |  |   |  |    |   |  |  |  |    |   |  |  |  |    |   |  |  |  |     |  |   |   |   |  |   |   |         |        |     |
| FR                                  | *                                                                                                                                                                                                                                                                                                                                                                                                                                                                                                                            |                    |         |        |  |  |    |   |  |  |  |    |  |  |   |  |    |   |  |  |  |    |   |  |  |  |    |   |  |  |  |     |  |   |   |   |  |   |   |         |        |     |
| PR                                  |                                                                                                                                                                                                                                                                                                                                                                                                                                                                                                                              |                    | *       |        |  |  |    |   |  |  |  |    |  |  |   |  |    |   |  |  |  |    |   |  |  |  |    |   |  |  |  |     |  |   |   |   |  |   |   |         |        |     |
| TD                                  | *                                                                                                                                                                                                                                                                                                                                                                                                                                                                                                                            |                    |         |        |  |  |    |   |  |  |  |    |  |  |   |  |    |   |  |  |  |    |   |  |  |  |    |   |  |  |  |     |  |   |   |   |  |   |   |         |        |     |
| FD                                  | *                                                                                                                                                                                                                                                                                                                                                                                                                                                                                                                            |                    |         |        |  |  |    |   |  |  |  |    |  |  |   |  |    |   |  |  |  |    |   |  |  |  |    |   |  |  |  |     |  |   |   |   |  |   |   |         |        |     |
| PD                                  | *                                                                                                                                                                                                                                                                                                                                                                                                                                                                                                                            |                    |         |        |  |  |    |   |  |  |  |    |  |  |   |  |    |   |  |  |  |    |   |  |  |  |    |   |  |  |  |     |  |   |   |   |  |   |   |         |        |     |
| FiR                                 |                                                                                                                                                                                                                                                                                                                                                                                                                                                                                                                              | *                  | *       | *      |  |  |    |   |  |  |  |    |  |  |   |  |    |   |  |  |  |    |   |  |  |  |    |   |  |  |  |     |  |   |   |   |  |   |   |         |        |     |
|                                     | F                                                                                                                                                                                                                                                                                                                                                                                                                                                                                                                            | S                  | P.shift | P.stay |  |  |    |   |  |  |  |    |  |  |   |  |    |   |  |  |  |    |   |  |  |  |    |   |  |  |  |     |  |   |   |   |  |   |   |         |        |     |

|                                      |                                                                                                                                                                                                                                                                                                                                                                                                                                                                                                                                                                                                                                        |   |                                                 |        |  |  |  |    |   |  |   |  |  |    |   |   |   |   |    |   |   |   |  |    |   |   |   |  |    |   |   |   |  |    |   |   |   |  |     |   |   |   |   |  |   |   |         |        |     |
|--------------------------------------|----------------------------------------------------------------------------------------------------------------------------------------------------------------------------------------------------------------------------------------------------------------------------------------------------------------------------------------------------------------------------------------------------------------------------------------------------------------------------------------------------------------------------------------------------------------------------------------------------------------------------------------|---|-------------------------------------------------|--------|--|--|--|----|---|--|---|--|--|----|---|---|---|---|----|---|---|---|--|----|---|---|---|--|----|---|---|---|--|----|---|---|---|--|-----|---|---|---|---|--|---|---|---------|--------|-----|
| Large river delta                    | <table><tr><td></td><td colspan="4">large river deltas</td><td></td></tr><tr><td>TR</td><td></td><td></td><td></td><td></td><td rowspan="7"></td></tr><tr><td>FR</td><td></td><td></td><td></td><td></td></tr><tr><td>PR</td><td></td><td></td><td></td><td></td></tr><tr><td>TD</td><td></td><td></td><td></td><td></td></tr><tr><td>FD</td><td></td><td></td><td></td><td></td></tr><tr><td>PD</td><td></td><td></td><td></td><td></td></tr><tr><td>FiR</td><td></td><td>*</td><td></td><td></td></tr><tr><td></td><td>F</td><td>S</td><td>P.shift</td><td>P.stay</td></tr></table>                                                  |   | large river deltas                              |        |  |  |  | TR |   |  |   |  |  | FR |   |   |   |   | PR |   |   |   |  | TD |   |   |   |  | FD |   |   |   |  | PD |   |   |   |  | FiR |   | * |   |   |  | F | S | P.shift | P.stay | 28  |
|                                      | large river deltas                                                                                                                                                                                                                                                                                                                                                                                                                                                                                                                                                                                                                     |   |                                                 |        |  |  |  |    |   |  |   |  |  |    |   |   |   |   |    |   |   |   |  |    |   |   |   |  |    |   |   |   |  |    |   |   |   |  |     |   |   |   |   |  |   |   |         |        |     |
| TR                                   |                                                                                                                                                                                                                                                                                                                                                                                                                                                                                                                                                                                                                                        |   |                                                 |        |  |  |  |    |   |  |   |  |  |    |   |   |   |   |    |   |   |   |  |    |   |   |   |  |    |   |   |   |  |    |   |   |   |  |     |   |   |   |   |  |   |   |         |        |     |
| FR                                   |                                                                                                                                                                                                                                                                                                                                                                                                                                                                                                                                                                                                                                        |   |                                                 |        |  |  |  |    |   |  |   |  |  |    |   |   |   |   |    |   |   |   |  |    |   |   |   |  |    |   |   |   |  |    |   |   |   |  |     |   |   |   |   |  |   |   |         |        |     |
| PR                                   |                                                                                                                                                                                                                                                                                                                                                                                                                                                                                                                                                                                                                                        |   |                                                 |        |  |  |  |    |   |  |   |  |  |    |   |   |   |   |    |   |   |   |  |    |   |   |   |  |    |   |   |   |  |    |   |   |   |  |     |   |   |   |   |  |   |   |         |        |     |
| TD                                   |                                                                                                                                                                                                                                                                                                                                                                                                                                                                                                                                                                                                                                        |   |                                                 |        |  |  |  |    |   |  |   |  |  |    |   |   |   |   |    |   |   |   |  |    |   |   |   |  |    |   |   |   |  |    |   |   |   |  |     |   |   |   |   |  |   |   |         |        |     |
| FD                                   |                                                                                                                                                                                                                                                                                                                                                                                                                                                                                                                                                                                                                                        |   |                                                 |        |  |  |  |    |   |  |   |  |  |    |   |   |   |   |    |   |   |   |  |    |   |   |   |  |    |   |   |   |  |    |   |   |   |  |     |   |   |   |   |  |   |   |         |        |     |
| PD                                   |                                                                                                                                                                                                                                                                                                                                                                                                                                                                                                                                                                                                                                        |   |                                                 |        |  |  |  |    |   |  |   |  |  |    |   |   |   |   |    |   |   |   |  |    |   |   |   |  |    |   |   |   |  |    |   |   |   |  |     |   |   |   |   |  |   |   |         |        |     |
| FiR                                  |                                                                                                                                                                                                                                                                                                                                                                                                                                                                                                                                                                                                                                        | * |                                                 |        |  |  |  |    |   |  |   |  |  |    |   |   |   |   |    |   |   |   |  |    |   |   |   |  |    |   |   |   |  |    |   |   |   |  |     |   |   |   |   |  |   |   |         |        |     |
|                                      | F                                                                                                                                                                                                                                                                                                                                                                                                                                                                                                                                                                                                                                      | S | P.shift                                         | P.stay |  |  |  |    |   |  |   |  |  |    |   |   |   |   |    |   |   |   |  |    |   |   |   |  |    |   |   |   |  |    |   |   |   |  |     |   |   |   |   |  |   |   |         |        |     |
| Montane freshwater                   | <table><tr><td></td><td colspan="4">montane freshwaters</td><td></td></tr><tr><td>TR</td><td>*</td><td></td><td></td><td></td><td rowspan="7"></td></tr><tr><td>FR</td><td>*</td><td>*</td><td></td><td></td></tr><tr><td>PR</td><td>*</td><td></td><td></td><td></td></tr><tr><td>TD</td><td>*</td><td></td><td></td><td></td></tr><tr><td>FD</td><td>*</td><td></td><td></td><td></td></tr><tr><td>PD</td><td>*</td><td></td><td></td><td></td></tr><tr><td>FiR</td><td>*</td><td></td><td></td><td></td></tr><tr><td></td><td>F</td><td>S</td><td>P.shift</td><td>P.stay</td></tr></table>                                          |   | montane freshwaters                             |        |  |  |  | TR | * |  |   |  |  | FR | * | * |   |   | PR | * |   |   |  | TD | * |   |   |  | FD | * |   |   |  | PD | * |   |   |  | FiR | * |   |   |   |  | F | S | P.shift | P.stay | 264 |
|                                      | montane freshwaters                                                                                                                                                                                                                                                                                                                                                                                                                                                                                                                                                                                                                    |   |                                                 |        |  |  |  |    |   |  |   |  |  |    |   |   |   |   |    |   |   |   |  |    |   |   |   |  |    |   |   |   |  |    |   |   |   |  |     |   |   |   |   |  |   |   |         |        |     |
| TR                                   | *                                                                                                                                                                                                                                                                                                                                                                                                                                                                                                                                                                                                                                      |   |                                                 |        |  |  |  |    |   |  |   |  |  |    |   |   |   |   |    |   |   |   |  |    |   |   |   |  |    |   |   |   |  |    |   |   |   |  |     |   |   |   |   |  |   |   |         |        |     |
| FR                                   | *                                                                                                                                                                                                                                                                                                                                                                                                                                                                                                                                                                                                                                      | * |                                                 |        |  |  |  |    |   |  |   |  |  |    |   |   |   |   |    |   |   |   |  |    |   |   |   |  |    |   |   |   |  |    |   |   |   |  |     |   |   |   |   |  |   |   |         |        |     |
| PR                                   | *                                                                                                                                                                                                                                                                                                                                                                                                                                                                                                                                                                                                                                      |   |                                                 |        |  |  |  |    |   |  |   |  |  |    |   |   |   |   |    |   |   |   |  |    |   |   |   |  |    |   |   |   |  |    |   |   |   |  |     |   |   |   |   |  |   |   |         |        |     |
| TD                                   | *                                                                                                                                                                                                                                                                                                                                                                                                                                                                                                                                                                                                                                      |   |                                                 |        |  |  |  |    |   |  |   |  |  |    |   |   |   |   |    |   |   |   |  |    |   |   |   |  |    |   |   |   |  |    |   |   |   |  |     |   |   |   |   |  |   |   |         |        |     |
| FD                                   | *                                                                                                                                                                                                                                                                                                                                                                                                                                                                                                                                                                                                                                      |   |                                                 |        |  |  |  |    |   |  |   |  |  |    |   |   |   |   |    |   |   |   |  |    |   |   |   |  |    |   |   |   |  |    |   |   |   |  |     |   |   |   |   |  |   |   |         |        |     |
| PD                                   | *                                                                                                                                                                                                                                                                                                                                                                                                                                                                                                                                                                                                                                      |   |                                                 |        |  |  |  |    |   |  |   |  |  |    |   |   |   |   |    |   |   |   |  |    |   |   |   |  |    |   |   |   |  |    |   |   |   |  |     |   |   |   |   |  |   |   |         |        |     |
| FiR                                  | *                                                                                                                                                                                                                                                                                                                                                                                                                                                                                                                                                                                                                                      |   |                                                 |        |  |  |  |    |   |  |   |  |  |    |   |   |   |   |    |   |   |   |  |    |   |   |   |  |    |   |   |   |  |    |   |   |   |  |     |   |   |   |   |  |   |   |         |        |     |
|                                      | F                                                                                                                                                                                                                                                                                                                                                                                                                                                                                                                                                                                                                                      | S | P.shift                                         | P.stay |  |  |  |    |   |  |   |  |  |    |   |   |   |   |    |   |   |   |  |    |   |   |   |  |    |   |   |   |  |    |   |   |   |  |     |   |   |   |   |  |   |   |         |        |     |
| Xeric freshwater and endorheic basin | <table><tr><td></td><td colspan="4">xeric freshwaters and endorheic (closed) basins</td><td></td></tr><tr><td>TR</td><td>*</td><td></td><td>*</td><td></td><td rowspan="7"></td></tr><tr><td>FR</td><td></td><td>*</td><td>*</td><td>*</td></tr><tr><td>PR</td><td>*</td><td>*</td><td>*</td><td></td></tr><tr><td>TD</td><td>*</td><td>*</td><td>*</td><td></td></tr><tr><td>FD</td><td>*</td><td>*</td><td>*</td><td></td></tr><tr><td>PD</td><td>*</td><td>*</td><td>*</td><td></td></tr><tr><td>FiR</td><td>*</td><td>*</td><td>*</td><td>*</td></tr><tr><td></td><td>F</td><td>S</td><td>P.shift</td><td>P.stay</td></tr></table> |   | xeric freshwaters and endorheic (closed) basins |        |  |  |  | TR | * |  | * |  |  | FR |   | * | * | * | PR | * | * | * |  | TD | * | * | * |  | FD | * | * | * |  | PD | * | * | * |  | FiR | * | * | * | * |  | F | S | P.shift | P.stay | 864 |
|                                      | xeric freshwaters and endorheic (closed) basins                                                                                                                                                                                                                                                                                                                                                                                                                                                                                                                                                                                        |   |                                                 |        |  |  |  |    |   |  |   |  |  |    |   |   |   |   |    |   |   |   |  |    |   |   |   |  |    |   |   |   |  |    |   |   |   |  |     |   |   |   |   |  |   |   |         |        |     |
| TR                                   | *                                                                                                                                                                                                                                                                                                                                                                                                                                                                                                                                                                                                                                      |   | *                                               |        |  |  |  |    |   |  |   |  |  |    |   |   |   |   |    |   |   |   |  |    |   |   |   |  |    |   |   |   |  |    |   |   |   |  |     |   |   |   |   |  |   |   |         |        |     |
| FR                                   |                                                                                                                                                                                                                                                                                                                                                                                                                                                                                                                                                                                                                                        | * | *                                               | *      |  |  |  |    |   |  |   |  |  |    |   |   |   |   |    |   |   |   |  |    |   |   |   |  |    |   |   |   |  |    |   |   |   |  |     |   |   |   |   |  |   |   |         |        |     |
| PR                                   | *                                                                                                                                                                                                                                                                                                                                                                                                                                                                                                                                                                                                                                      | * | *                                               |        |  |  |  |    |   |  |   |  |  |    |   |   |   |   |    |   |   |   |  |    |   |   |   |  |    |   |   |   |  |    |   |   |   |  |     |   |   |   |   |  |   |   |         |        |     |
| TD                                   | *                                                                                                                                                                                                                                                                                                                                                                                                                                                                                                                                                                                                                                      | * | *                                               |        |  |  |  |    |   |  |   |  |  |    |   |   |   |   |    |   |   |   |  |    |   |   |   |  |    |   |   |   |  |    |   |   |   |  |     |   |   |   |   |  |   |   |         |        |     |
| FD                                   | *                                                                                                                                                                                                                                                                                                                                                                                                                                                                                                                                                                                                                                      | * | *                                               |        |  |  |  |    |   |  |   |  |  |    |   |   |   |   |    |   |   |   |  |    |   |   |   |  |    |   |   |   |  |    |   |   |   |  |     |   |   |   |   |  |   |   |         |        |     |
| PD                                   | *                                                                                                                                                                                                                                                                                                                                                                                                                                                                                                                                                                                                                                      | * | *                                               |        |  |  |  |    |   |  |   |  |  |    |   |   |   |   |    |   |   |   |  |    |   |   |   |  |    |   |   |   |  |    |   |   |   |  |     |   |   |   |   |  |   |   |         |        |     |
| FiR                                  | *                                                                                                                                                                                                                                                                                                                                                                                                                                                                                                                                                                                                                                      | * | *                                               | *      |  |  |  |    |   |  |   |  |  |    |   |   |   |   |    |   |   |   |  |    |   |   |   |  |    |   |   |   |  |    |   |   |   |  |     |   |   |   |   |  |   |   |         |        |     |
|                                      | F                                                                                                                                                                                                                                                                                                                                                                                                                                                                                                                                                                                                                                      | S | P.shift                                         | P.stay |  |  |  |    |   |  |   |  |  |    |   |   |   |   |    |   |   |   |  |    |   |   |   |  |    |   |   |   |  |    |   |   |   |  |     |   |   |   |   |  |   |   |         |        |     |

|                                         |                                                                                                                                                                                                                                                                                                                                                                                                                                                                                                                                                                                                                                                                          |   |                                          |        |  |  |  |    |   |   |   |   |  |    |   |   |   |   |  |    |   |   |  |   |  |    |   |  |  |  |  |    |   |  |   |  |  |    |   |  |  |  |  |     |   |   |  |   |  |  |   |   |         |        |  |     |
|-----------------------------------------|--------------------------------------------------------------------------------------------------------------------------------------------------------------------------------------------------------------------------------------------------------------------------------------------------------------------------------------------------------------------------------------------------------------------------------------------------------------------------------------------------------------------------------------------------------------------------------------------------------------------------------------------------------------------------|---|------------------------------------------|--------|--|--|--|----|---|---|---|---|--|----|---|---|---|---|--|----|---|---|--|---|--|----|---|--|--|--|--|----|---|--|---|--|--|----|---|--|--|--|--|-----|---|---|--|---|--|--|---|---|---------|--------|--|-----|
| Temperate coastal rivers                | <table><tr><td></td><td colspan="4">temperate coastal rivers</td><td></td></tr><tr><td>TR</td><td>*</td><td>*</td><td></td><td>*</td><td></td></tr><tr><td>FR</td><td>*</td><td>*</td><td></td><td></td><td></td></tr><tr><td>PR</td><td>*</td><td>*</td><td></td><td>*</td><td></td></tr><tr><td>TD</td><td></td><td></td><td></td><td></td><td></td></tr><tr><td>FD</td><td></td><td></td><td>*</td><td></td><td></td></tr><tr><td>PD</td><td></td><td></td><td></td><td></td><td></td></tr><tr><td>FiR</td><td>*</td><td>*</td><td></td><td></td><td></td></tr><tr><td></td><td>F</td><td>S</td><td>P.shift</td><td>P.stay</td><td></td></tr></table>                 |   | temperate coastal rivers                 |        |  |  |  | TR | * | * |   | * |  | FR | * | * |   |   |  | PR | * | * |  | * |  | TD |   |  |  |  |  | FD |   |  | * |  |  | PD |   |  |  |  |  | FiR | * | * |  |   |  |  | F | S | P.shift | P.stay |  | 483 |
|                                         | temperate coastal rivers                                                                                                                                                                                                                                                                                                                                                                                                                                                                                                                                                                                                                                                 |   |                                          |        |  |  |  |    |   |   |   |   |  |    |   |   |   |   |  |    |   |   |  |   |  |    |   |  |  |  |  |    |   |  |   |  |  |    |   |  |  |  |  |     |   |   |  |   |  |  |   |   |         |        |  |     |
| TR                                      | *                                                                                                                                                                                                                                                                                                                                                                                                                                                                                                                                                                                                                                                                        | * |                                          | *      |  |  |  |    |   |   |   |   |  |    |   |   |   |   |  |    |   |   |  |   |  |    |   |  |  |  |  |    |   |  |   |  |  |    |   |  |  |  |  |     |   |   |  |   |  |  |   |   |         |        |  |     |
| FR                                      | *                                                                                                                                                                                                                                                                                                                                                                                                                                                                                                                                                                                                                                                                        | * |                                          |        |  |  |  |    |   |   |   |   |  |    |   |   |   |   |  |    |   |   |  |   |  |    |   |  |  |  |  |    |   |  |   |  |  |    |   |  |  |  |  |     |   |   |  |   |  |  |   |   |         |        |  |     |
| PR                                      | *                                                                                                                                                                                                                                                                                                                                                                                                                                                                                                                                                                                                                                                                        | * |                                          | *      |  |  |  |    |   |   |   |   |  |    |   |   |   |   |  |    |   |   |  |   |  |    |   |  |  |  |  |    |   |  |   |  |  |    |   |  |  |  |  |     |   |   |  |   |  |  |   |   |         |        |  |     |
| TD                                      |                                                                                                                                                                                                                                                                                                                                                                                                                                                                                                                                                                                                                                                                          |   |                                          |        |  |  |  |    |   |   |   |   |  |    |   |   |   |   |  |    |   |   |  |   |  |    |   |  |  |  |  |    |   |  |   |  |  |    |   |  |  |  |  |     |   |   |  |   |  |  |   |   |         |        |  |     |
| FD                                      |                                                                                                                                                                                                                                                                                                                                                                                                                                                                                                                                                                                                                                                                          |   | *                                        |        |  |  |  |    |   |   |   |   |  |    |   |   |   |   |  |    |   |   |  |   |  |    |   |  |  |  |  |    |   |  |   |  |  |    |   |  |  |  |  |     |   |   |  |   |  |  |   |   |         |        |  |     |
| PD                                      |                                                                                                                                                                                                                                                                                                                                                                                                                                                                                                                                                                                                                                                                          |   |                                          |        |  |  |  |    |   |   |   |   |  |    |   |   |   |   |  |    |   |   |  |   |  |    |   |  |  |  |  |    |   |  |   |  |  |    |   |  |  |  |  |     |   |   |  |   |  |  |   |   |         |        |  |     |
| FiR                                     | *                                                                                                                                                                                                                                                                                                                                                                                                                                                                                                                                                                                                                                                                        | * |                                          |        |  |  |  |    |   |   |   |   |  |    |   |   |   |   |  |    |   |   |  |   |  |    |   |  |  |  |  |    |   |  |   |  |  |    |   |  |  |  |  |     |   |   |  |   |  |  |   |   |         |        |  |     |
|                                         | F                                                                                                                                                                                                                                                                                                                                                                                                                                                                                                                                                                                                                                                                        | S | P.shift                                  | P.stay |  |  |  |    |   |   |   |   |  |    |   |   |   |   |  |    |   |   |  |   |  |    |   |  |  |  |  |    |   |  |   |  |  |    |   |  |  |  |  |     |   |   |  |   |  |  |   |   |         |        |  |     |
| Temperate upland rivers                 | <table><tr><td></td><td colspan="4">temperate upland rivers</td><td></td></tr><tr><td>TR</td><td></td><td></td><td></td><td></td><td></td></tr><tr><td>FR</td><td></td><td></td><td></td><td></td><td></td></tr><tr><td>PR</td><td></td><td></td><td></td><td></td><td></td></tr><tr><td>TD</td><td></td><td></td><td></td><td></td><td></td></tr><tr><td>FD</td><td></td><td></td><td>*</td><td></td><td></td></tr><tr><td>PD</td><td></td><td></td><td></td><td></td><td></td></tr><tr><td>FiR</td><td>*</td><td>*</td><td></td><td>*</td><td></td></tr><tr><td></td><td>F</td><td>S</td><td>P.shift</td><td>P.stay</td><td></td></tr></table>                         |   | temperate upland rivers                  |        |  |  |  | TR |   |   |   |   |  | FR |   |   |   |   |  | PR |   |   |  |   |  | TD |   |  |  |  |  | FD |   |  | * |  |  | PD |   |  |  |  |  | FiR | * | * |  | * |  |  | F | S | P.shift | P.stay |  | 180 |
|                                         | temperate upland rivers                                                                                                                                                                                                                                                                                                                                                                                                                                                                                                                                                                                                                                                  |   |                                          |        |  |  |  |    |   |   |   |   |  |    |   |   |   |   |  |    |   |   |  |   |  |    |   |  |  |  |  |    |   |  |   |  |  |    |   |  |  |  |  |     |   |   |  |   |  |  |   |   |         |        |  |     |
| TR                                      |                                                                                                                                                                                                                                                                                                                                                                                                                                                                                                                                                                                                                                                                          |   |                                          |        |  |  |  |    |   |   |   |   |  |    |   |   |   |   |  |    |   |   |  |   |  |    |   |  |  |  |  |    |   |  |   |  |  |    |   |  |  |  |  |     |   |   |  |   |  |  |   |   |         |        |  |     |
| FR                                      |                                                                                                                                                                                                                                                                                                                                                                                                                                                                                                                                                                                                                                                                          |   |                                          |        |  |  |  |    |   |   |   |   |  |    |   |   |   |   |  |    |   |   |  |   |  |    |   |  |  |  |  |    |   |  |   |  |  |    |   |  |  |  |  |     |   |   |  |   |  |  |   |   |         |        |  |     |
| PR                                      |                                                                                                                                                                                                                                                                                                                                                                                                                                                                                                                                                                                                                                                                          |   |                                          |        |  |  |  |    |   |   |   |   |  |    |   |   |   |   |  |    |   |   |  |   |  |    |   |  |  |  |  |    |   |  |   |  |  |    |   |  |  |  |  |     |   |   |  |   |  |  |   |   |         |        |  |     |
| TD                                      |                                                                                                                                                                                                                                                                                                                                                                                                                                                                                                                                                                                                                                                                          |   |                                          |        |  |  |  |    |   |   |   |   |  |    |   |   |   |   |  |    |   |   |  |   |  |    |   |  |  |  |  |    |   |  |   |  |  |    |   |  |  |  |  |     |   |   |  |   |  |  |   |   |         |        |  |     |
| FD                                      |                                                                                                                                                                                                                                                                                                                                                                                                                                                                                                                                                                                                                                                                          |   | *                                        |        |  |  |  |    |   |   |   |   |  |    |   |   |   |   |  |    |   |   |  |   |  |    |   |  |  |  |  |    |   |  |   |  |  |    |   |  |  |  |  |     |   |   |  |   |  |  |   |   |         |        |  |     |
| PD                                      |                                                                                                                                                                                                                                                                                                                                                                                                                                                                                                                                                                                                                                                                          |   |                                          |        |  |  |  |    |   |   |   |   |  |    |   |   |   |   |  |    |   |   |  |   |  |    |   |  |  |  |  |    |   |  |   |  |  |    |   |  |  |  |  |     |   |   |  |   |  |  |   |   |         |        |  |     |
| FiR                                     | *                                                                                                                                                                                                                                                                                                                                                                                                                                                                                                                                                                                                                                                                        | * |                                          | *      |  |  |  |    |   |   |   |   |  |    |   |   |   |   |  |    |   |   |  |   |  |    |   |  |  |  |  |    |   |  |   |  |  |    |   |  |  |  |  |     |   |   |  |   |  |  |   |   |         |        |  |     |
|                                         | F                                                                                                                                                                                                                                                                                                                                                                                                                                                                                                                                                                                                                                                                        | S | P.shift                                  | P.stay |  |  |  |    |   |   |   |   |  |    |   |   |   |   |  |    |   |   |  |   |  |    |   |  |  |  |  |    |   |  |   |  |  |    |   |  |  |  |  |     |   |   |  |   |  |  |   |   |         |        |  |     |
| Temperate floodplain river and wetlands | <table><tr><td></td><td colspan="4">temperate floodplain rivers and wetlands</td><td></td></tr><tr><td>TR</td><td></td><td></td><td>*</td><td>*</td><td></td></tr><tr><td>FR</td><td>*</td><td>*</td><td>*</td><td>*</td><td></td></tr><tr><td>PR</td><td></td><td></td><td></td><td>*</td><td></td></tr><tr><td>TD</td><td>*</td><td></td><td></td><td></td><td></td></tr><tr><td>FD</td><td>*</td><td></td><td></td><td></td><td></td></tr><tr><td>PD</td><td>*</td><td></td><td></td><td></td><td></td></tr><tr><td>FiR</td><td>*</td><td></td><td></td><td></td><td></td></tr><tr><td></td><td>F</td><td>S</td><td>P.shift</td><td>P.stay</td><td></td></tr></table> |   | temperate floodplain rivers and wetlands |        |  |  |  | TR |   |   | * | * |  | FR | * | * | * | * |  | PR |   |   |  | * |  | TD | * |  |  |  |  | FD | * |  |   |  |  | PD | * |  |  |  |  | FiR | * |   |  |   |  |  | F | S | P.shift | P.stay |  | 538 |
|                                         | temperate floodplain rivers and wetlands                                                                                                                                                                                                                                                                                                                                                                                                                                                                                                                                                                                                                                 |   |                                          |        |  |  |  |    |   |   |   |   |  |    |   |   |   |   |  |    |   |   |  |   |  |    |   |  |  |  |  |    |   |  |   |  |  |    |   |  |  |  |  |     |   |   |  |   |  |  |   |   |         |        |  |     |
| TR                                      |                                                                                                                                                                                                                                                                                                                                                                                                                                                                                                                                                                                                                                                                          |   | *                                        | *      |  |  |  |    |   |   |   |   |  |    |   |   |   |   |  |    |   |   |  |   |  |    |   |  |  |  |  |    |   |  |   |  |  |    |   |  |  |  |  |     |   |   |  |   |  |  |   |   |         |        |  |     |
| FR                                      | *                                                                                                                                                                                                                                                                                                                                                                                                                                                                                                                                                                                                                                                                        | * | *                                        | *      |  |  |  |    |   |   |   |   |  |    |   |   |   |   |  |    |   |   |  |   |  |    |   |  |  |  |  |    |   |  |   |  |  |    |   |  |  |  |  |     |   |   |  |   |  |  |   |   |         |        |  |     |
| PR                                      |                                                                                                                                                                                                                                                                                                                                                                                                                                                                                                                                                                                                                                                                          |   |                                          | *      |  |  |  |    |   |   |   |   |  |    |   |   |   |   |  |    |   |   |  |   |  |    |   |  |  |  |  |    |   |  |   |  |  |    |   |  |  |  |  |     |   |   |  |   |  |  |   |   |         |        |  |     |
| TD                                      | *                                                                                                                                                                                                                                                                                                                                                                                                                                                                                                                                                                                                                                                                        |   |                                          |        |  |  |  |    |   |   |   |   |  |    |   |   |   |   |  |    |   |   |  |   |  |    |   |  |  |  |  |    |   |  |   |  |  |    |   |  |  |  |  |     |   |   |  |   |  |  |   |   |         |        |  |     |
| FD                                      | *                                                                                                                                                                                                                                                                                                                                                                                                                                                                                                                                                                                                                                                                        |   |                                          |        |  |  |  |    |   |   |   |   |  |    |   |   |   |   |  |    |   |   |  |   |  |    |   |  |  |  |  |    |   |  |   |  |  |    |   |  |  |  |  |     |   |   |  |   |  |  |   |   |         |        |  |     |
| PD                                      | *                                                                                                                                                                                                                                                                                                                                                                                                                                                                                                                                                                                                                                                                        |   |                                          |        |  |  |  |    |   |   |   |   |  |    |   |   |   |   |  |    |   |   |  |   |  |    |   |  |  |  |  |    |   |  |   |  |  |    |   |  |  |  |  |     |   |   |  |   |  |  |   |   |         |        |  |     |
| FiR                                     | *                                                                                                                                                                                                                                                                                                                                                                                                                                                                                                                                                                                                                                                                        |   |                                          |        |  |  |  |    |   |   |   |   |  |    |   |   |   |   |  |    |   |   |  |   |  |    |   |  |  |  |  |    |   |  |   |  |  |    |   |  |  |  |  |     |   |   |  |   |  |  |   |   |         |        |  |     |
|                                         | F                                                                                                                                                                                                                                                                                                                                                                                                                                                                                                                                                                                                                                                                        | S | P.shift                                  | P.stay |  |  |  |    |   |   |   |   |  |    |   |   |   |   |  |    |   |   |  |   |  |    |   |  |  |  |  |    |   |  |   |  |  |    |   |  |  |  |  |     |   |   |  |   |  |  |   |   |         |        |  |     |

|                                                                  |                                                                                                                                                                                                                                                                                                                                                                                                                                                                                                                                                                                                                                         |                                                                  |         |        |  |  |    |   |   |   |   |    |   |   |   |  |    |   |   |   |   |    |   |   |   |   |    |   |   |   |   |    |   |   |   |   |     |   |   |   |   |     |   |   |         |        |     |   |   |         |        |     |
|------------------------------------------------------------------|-----------------------------------------------------------------------------------------------------------------------------------------------------------------------------------------------------------------------------------------------------------------------------------------------------------------------------------------------------------------------------------------------------------------------------------------------------------------------------------------------------------------------------------------------------------------------------------------------------------------------------------------|------------------------------------------------------------------|---------|--------|--|--|----|---|---|---|---|----|---|---|---|--|----|---|---|---|---|----|---|---|---|---|----|---|---|---|---|----|---|---|---|---|-----|---|---|---|---|-----|---|---|---------|--------|-----|---|---|---------|--------|-----|
| Tropical and subtropical coastal rivers                          | <table><tr><td colspan="5">tropical and subtropical coastal rivers</td></tr><tr><td>TR</td><td></td><td>*</td><td></td><td></td></tr><tr><td>FR</td><td></td><td></td><td></td><td></td></tr><tr><td>PR</td><td></td><td>*</td><td></td><td></td></tr><tr><td>TD</td><td></td><td>*</td><td></td><td></td></tr><tr><td>FD</td><td></td><td>*</td><td></td><td></td></tr><tr><td>PD</td><td></td><td>*</td><td></td><td></td></tr><tr><td>AmR</td><td>*</td><td>*</td><td>*</td><td>*</td></tr><tr><td>FiR</td><td>*</td><td>*</td><td></td><td>*</td></tr><tr><td></td><td>F</td><td>S</td><td>P.shift</td><td>P.stay</td></tr></table> | tropical and subtropical coastal rivers                          |         |        |  |  | TR |   | * |   |   | FR |   |   |   |  | PR |   | * |   |   | TD |   | * |   |   | FD |   | * |   |   | PD |   | * |   |   | AmR | * | * | * | * | FiR | * | * |         | *      |     | F | S | P.shift | P.stay | 428 |
| tropical and subtropical coastal rivers                          |                                                                                                                                                                                                                                                                                                                                                                                                                                                                                                                                                                                                                                         |                                                                  |         |        |  |  |    |   |   |   |   |    |   |   |   |  |    |   |   |   |   |    |   |   |   |   |    |   |   |   |   |    |   |   |   |   |     |   |   |   |   |     |   |   |         |        |     |   |   |         |        |     |
| TR                                                               |                                                                                                                                                                                                                                                                                                                                                                                                                                                                                                                                                                                                                                         | *                                                                |         |        |  |  |    |   |   |   |   |    |   |   |   |  |    |   |   |   |   |    |   |   |   |   |    |   |   |   |   |    |   |   |   |   |     |   |   |   |   |     |   |   |         |        |     |   |   |         |        |     |
| FR                                                               |                                                                                                                                                                                                                                                                                                                                                                                                                                                                                                                                                                                                                                         |                                                                  |         |        |  |  |    |   |   |   |   |    |   |   |   |  |    |   |   |   |   |    |   |   |   |   |    |   |   |   |   |    |   |   |   |   |     |   |   |   |   |     |   |   |         |        |     |   |   |         |        |     |
| PR                                                               |                                                                                                                                                                                                                                                                                                                                                                                                                                                                                                                                                                                                                                         | *                                                                |         |        |  |  |    |   |   |   |   |    |   |   |   |  |    |   |   |   |   |    |   |   |   |   |    |   |   |   |   |    |   |   |   |   |     |   |   |   |   |     |   |   |         |        |     |   |   |         |        |     |
| TD                                                               |                                                                                                                                                                                                                                                                                                                                                                                                                                                                                                                                                                                                                                         | *                                                                |         |        |  |  |    |   |   |   |   |    |   |   |   |  |    |   |   |   |   |    |   |   |   |   |    |   |   |   |   |    |   |   |   |   |     |   |   |   |   |     |   |   |         |        |     |   |   |         |        |     |
| FD                                                               |                                                                                                                                                                                                                                                                                                                                                                                                                                                                                                                                                                                                                                         | *                                                                |         |        |  |  |    |   |   |   |   |    |   |   |   |  |    |   |   |   |   |    |   |   |   |   |    |   |   |   |   |    |   |   |   |   |     |   |   |   |   |     |   |   |         |        |     |   |   |         |        |     |
| PD                                                               |                                                                                                                                                                                                                                                                                                                                                                                                                                                                                                                                                                                                                                         | *                                                                |         |        |  |  |    |   |   |   |   |    |   |   |   |  |    |   |   |   |   |    |   |   |   |   |    |   |   |   |   |    |   |   |   |   |     |   |   |   |   |     |   |   |         |        |     |   |   |         |        |     |
| AmR                                                              | *                                                                                                                                                                                                                                                                                                                                                                                                                                                                                                                                                                                                                                       | *                                                                | *       | *      |  |  |    |   |   |   |   |    |   |   |   |  |    |   |   |   |   |    |   |   |   |   |    |   |   |   |   |    |   |   |   |   |     |   |   |   |   |     |   |   |         |        |     |   |   |         |        |     |
| FiR                                                              | *                                                                                                                                                                                                                                                                                                                                                                                                                                                                                                                                                                                                                                       | *                                                                |         | *      |  |  |    |   |   |   |   |    |   |   |   |  |    |   |   |   |   |    |   |   |   |   |    |   |   |   |   |    |   |   |   |   |     |   |   |   |   |     |   |   |         |        |     |   |   |         |        |     |
|                                                                  | F                                                                                                                                                                                                                                                                                                                                                                                                                                                                                                                                                                                                                                       | S                                                                | P.shift | P.stay |  |  |    |   |   |   |   |    |   |   |   |  |    |   |   |   |   |    |   |   |   |   |    |   |   |   |   |    |   |   |   |   |     |   |   |   |   |     |   |   |         |        |     |   |   |         |        |     |
| Tropical and subtropical upland rivers                           | <table><tr><td colspan="5">tropical and subtropical coastal rivers</td></tr><tr><td>TR</td><td></td><td>*</td><td></td><td></td></tr><tr><td>FR</td><td></td><td></td><td></td><td></td></tr><tr><td>PR</td><td></td><td>*</td><td></td><td></td></tr><tr><td>TD</td><td></td><td>*</td><td></td><td></td></tr><tr><td>FD</td><td></td><td>*</td><td></td><td></td></tr><tr><td>PD</td><td></td><td>*</td><td></td><td></td></tr><tr><td>FiR</td><td>*</td><td>*</td><td></td><td>*</td></tr><tr><td></td><td>F</td><td>S</td><td>P.shift</td><td>P.stay</td></tr></table>                                                              | tropical and subtropical coastal rivers                          |         |        |  |  | TR |   | * |   |   | FR |   |   |   |  | PR |   | * |   |   | TD |   | * |   |   | FD |   | * |   |   | PD |   | * |   |   | FiR | * | * |   | * |     | F | S | P.shift | P.stay | 223 |   |   |         |        |     |
| tropical and subtropical coastal rivers                          |                                                                                                                                                                                                                                                                                                                                                                                                                                                                                                                                                                                                                                         |                                                                  |         |        |  |  |    |   |   |   |   |    |   |   |   |  |    |   |   |   |   |    |   |   |   |   |    |   |   |   |   |    |   |   |   |   |     |   |   |   |   |     |   |   |         |        |     |   |   |         |        |     |
| TR                                                               |                                                                                                                                                                                                                                                                                                                                                                                                                                                                                                                                                                                                                                         | *                                                                |         |        |  |  |    |   |   |   |   |    |   |   |   |  |    |   |   |   |   |    |   |   |   |   |    |   |   |   |   |    |   |   |   |   |     |   |   |   |   |     |   |   |         |        |     |   |   |         |        |     |
| FR                                                               |                                                                                                                                                                                                                                                                                                                                                                                                                                                                                                                                                                                                                                         |                                                                  |         |        |  |  |    |   |   |   |   |    |   |   |   |  |    |   |   |   |   |    |   |   |   |   |    |   |   |   |   |    |   |   |   |   |     |   |   |   |   |     |   |   |         |        |     |   |   |         |        |     |
| PR                                                               |                                                                                                                                                                                                                                                                                                                                                                                                                                                                                                                                                                                                                                         | *                                                                |         |        |  |  |    |   |   |   |   |    |   |   |   |  |    |   |   |   |   |    |   |   |   |   |    |   |   |   |   |    |   |   |   |   |     |   |   |   |   |     |   |   |         |        |     |   |   |         |        |     |
| TD                                                               |                                                                                                                                                                                                                                                                                                                                                                                                                                                                                                                                                                                                                                         | *                                                                |         |        |  |  |    |   |   |   |   |    |   |   |   |  |    |   |   |   |   |    |   |   |   |   |    |   |   |   |   |    |   |   |   |   |     |   |   |   |   |     |   |   |         |        |     |   |   |         |        |     |
| FD                                                               |                                                                                                                                                                                                                                                                                                                                                                                                                                                                                                                                                                                                                                         | *                                                                |         |        |  |  |    |   |   |   |   |    |   |   |   |  |    |   |   |   |   |    |   |   |   |   |    |   |   |   |   |    |   |   |   |   |     |   |   |   |   |     |   |   |         |        |     |   |   |         |        |     |
| PD                                                               |                                                                                                                                                                                                                                                                                                                                                                                                                                                                                                                                                                                                                                         | *                                                                |         |        |  |  |    |   |   |   |   |    |   |   |   |  |    |   |   |   |   |    |   |   |   |   |    |   |   |   |   |    |   |   |   |   |     |   |   |   |   |     |   |   |         |        |     |   |   |         |        |     |
| FiR                                                              | *                                                                                                                                                                                                                                                                                                                                                                                                                                                                                                                                                                                                                                       | *                                                                |         | *      |  |  |    |   |   |   |   |    |   |   |   |  |    |   |   |   |   |    |   |   |   |   |    |   |   |   |   |    |   |   |   |   |     |   |   |   |   |     |   |   |         |        |     |   |   |         |        |     |
|                                                                  | F                                                                                                                                                                                                                                                                                                                                                                                                                                                                                                                                                                                                                                       | S                                                                | P.shift | P.stay |  |  |    |   |   |   |   |    |   |   |   |  |    |   |   |   |   |    |   |   |   |   |    |   |   |   |   |    |   |   |   |   |     |   |   |   |   |     |   |   |         |        |     |   |   |         |        |     |
| Tropical and subtropical floodplain rivers and wetlands          | <table><tr><td colspan="5">tropical and subtropical floodplain rivers and wetland complexes</td></tr><tr><td>TR</td><td>*</td><td>*</td><td>*</td><td>*</td></tr><tr><td>FR</td><td>*</td><td>*</td><td>*</td><td></td></tr><tr><td>PR</td><td>*</td><td>*</td><td>*</td><td>*</td></tr><tr><td>TD</td><td>*</td><td>*</td><td>*</td><td>*</td></tr><tr><td>FD</td><td>*</td><td>*</td><td>*</td><td>*</td></tr><tr><td>PD</td><td>*</td><td>*</td><td>*</td><td>*</td></tr><tr><td>FiR</td><td>*</td><td>*</td><td>*</td><td>*</td></tr><tr><td></td><td>F</td><td>S</td><td>P.shift</td><td>P.stay</td></tr></table>                  | tropical and subtropical floodplain rivers and wetland complexes |         |        |  |  | TR | * | * | * | * | FR | * | * | * |  | PR | * | * | * | * | TD | * | * | * | * | FD | * | * | * | * | PD | * | * | * | * | FiR | * | * | * | * |     | F | S | P.shift | P.stay | 462 |   |   |         |        |     |
| tropical and subtropical floodplain rivers and wetland complexes |                                                                                                                                                                                                                                                                                                                                                                                                                                                                                                                                                                                                                                         |                                                                  |         |        |  |  |    |   |   |   |   |    |   |   |   |  |    |   |   |   |   |    |   |   |   |   |    |   |   |   |   |    |   |   |   |   |     |   |   |   |   |     |   |   |         |        |     |   |   |         |        |     |
| TR                                                               | *                                                                                                                                                                                                                                                                                                                                                                                                                                                                                                                                                                                                                                       | *                                                                | *       | *      |  |  |    |   |   |   |   |    |   |   |   |  |    |   |   |   |   |    |   |   |   |   |    |   |   |   |   |    |   |   |   |   |     |   |   |   |   |     |   |   |         |        |     |   |   |         |        |     |
| FR                                                               | *                                                                                                                                                                                                                                                                                                                                                                                                                                                                                                                                                                                                                                       | *                                                                | *       |        |  |  |    |   |   |   |   |    |   |   |   |  |    |   |   |   |   |    |   |   |   |   |    |   |   |   |   |    |   |   |   |   |     |   |   |   |   |     |   |   |         |        |     |   |   |         |        |     |
| PR                                                               | *                                                                                                                                                                                                                                                                                                                                                                                                                                                                                                                                                                                                                                       | *                                                                | *       | *      |  |  |    |   |   |   |   |    |   |   |   |  |    |   |   |   |   |    |   |   |   |   |    |   |   |   |   |    |   |   |   |   |     |   |   |   |   |     |   |   |         |        |     |   |   |         |        |     |
| TD                                                               | *                                                                                                                                                                                                                                                                                                                                                                                                                                                                                                                                                                                                                                       | *                                                                | *       | *      |  |  |    |   |   |   |   |    |   |   |   |  |    |   |   |   |   |    |   |   |   |   |    |   |   |   |   |    |   |   |   |   |     |   |   |   |   |     |   |   |         |        |     |   |   |         |        |     |
| FD                                                               | *                                                                                                                                                                                                                                                                                                                                                                                                                                                                                                                                                                                                                                       | *                                                                | *       | *      |  |  |    |   |   |   |   |    |   |   |   |  |    |   |   |   |   |    |   |   |   |   |    |   |   |   |   |    |   |   |   |   |     |   |   |   |   |     |   |   |         |        |     |   |   |         |        |     |
| PD                                                               | *                                                                                                                                                                                                                                                                                                                                                                                                                                                                                                                                                                                                                                       | *                                                                | *       | *      |  |  |    |   |   |   |   |    |   |   |   |  |    |   |   |   |   |    |   |   |   |   |    |   |   |   |   |    |   |   |   |   |     |   |   |   |   |     |   |   |         |        |     |   |   |         |        |     |
| FiR                                                              | *                                                                                                                                                                                                                                                                                                                                                                                                                                                                                                                                                                                                                                       | *                                                                | *       | *      |  |  |    |   |   |   |   |    |   |   |   |  |    |   |   |   |   |    |   |   |   |   |    |   |   |   |   |    |   |   |   |   |     |   |   |   |   |     |   |   |         |        |     |   |   |         |        |     |
|                                                                  | F                                                                                                                                                                                                                                                                                                                                                                                                                                                                                                                                                                                                                                       | S                                                                | P.shift | P.stay |  |  |    |   |   |   |   |    |   |   |   |  |    |   |   |   |   |    |   |   |   |   |    |   |   |   |   |    |   |   |   |   |     |   |   |   |   |     |   |   |         |        |     |   |   |         |        |     |

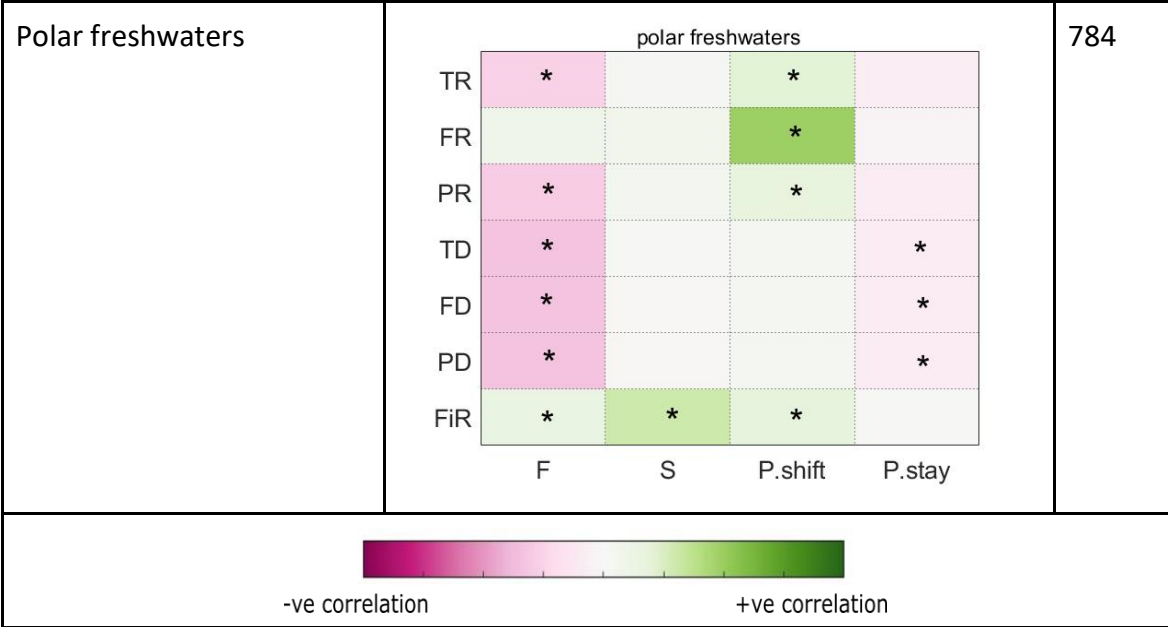

**S.8 Analysis using RivFishTIME dataset**

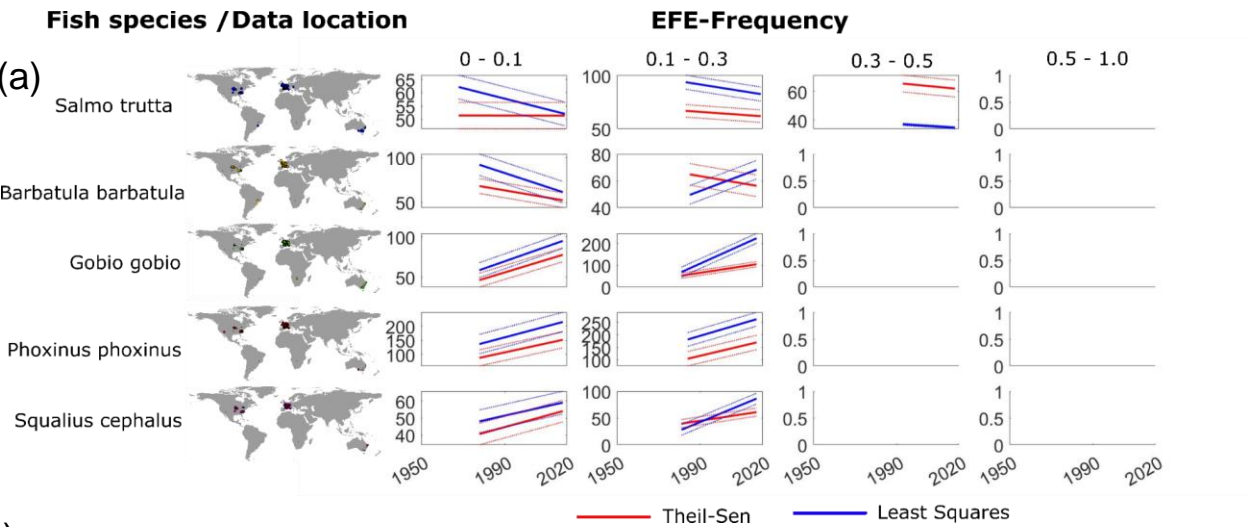

(b)

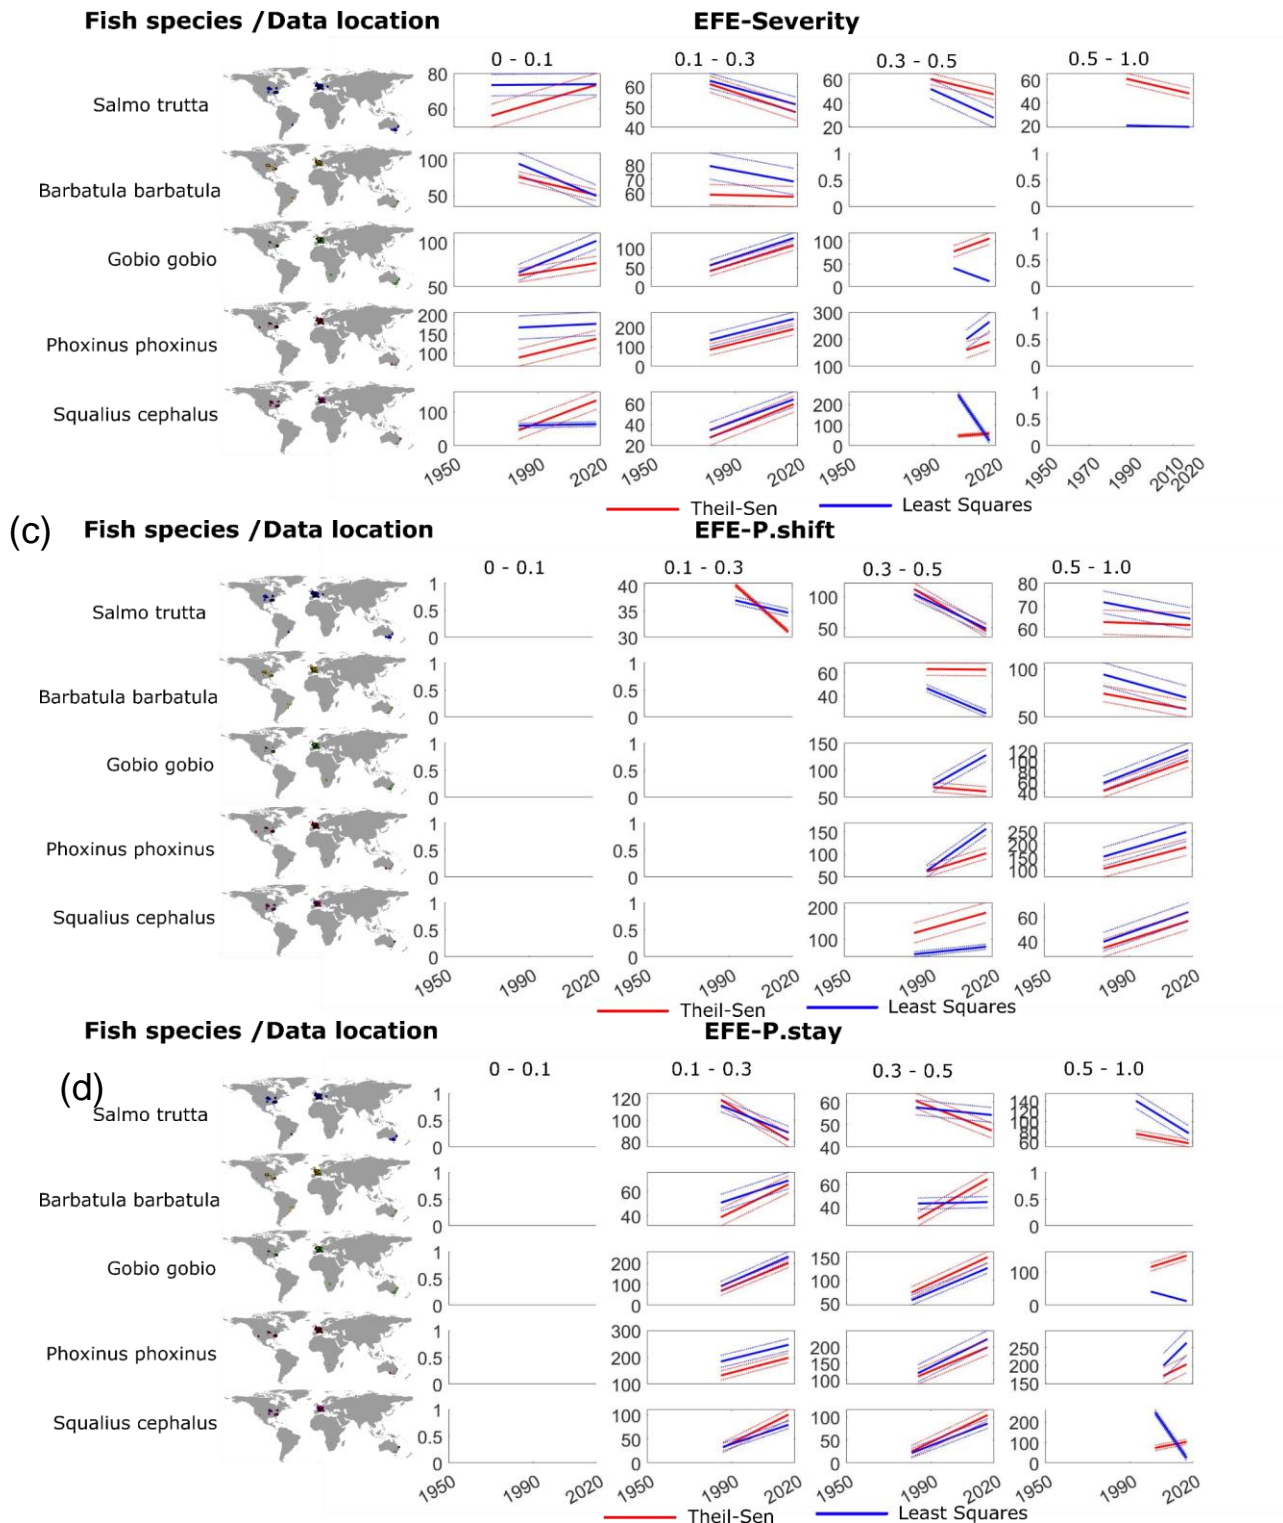

Fig. S8 Directional change in the abundance in 5 freshwater species categorized by different levels of EF violation indices; (a) F, (b) S, (c) P.shift and (d) P.stay.

Note: The dotted lines around the solid line represent the spread in different basins in each category



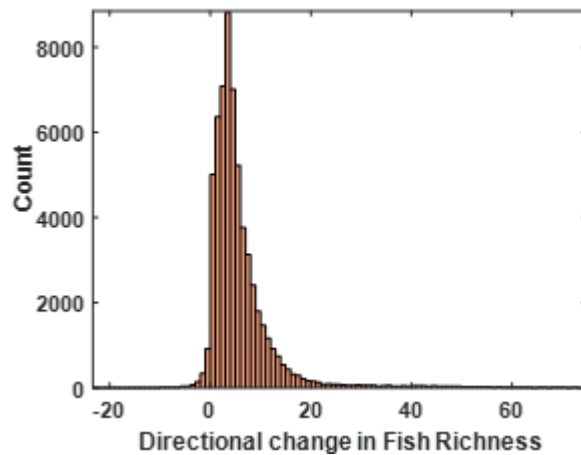

Fig. S9 Histogram of directional change in all the time series in RivFishTIME dataset. 97% of the fish time series are showing an increasing trend over time

RivFishTIME dataset was compiled from long-term riverine fish surveys from 46 regional and national monitoring programmes and from individual academic research efforts (Comte et al., 2021). The database includes 646,270 species-specific abundance time series covering 704 fish species. The data were collected from 11386 sites spanning over 19 countries (Fig. S9)

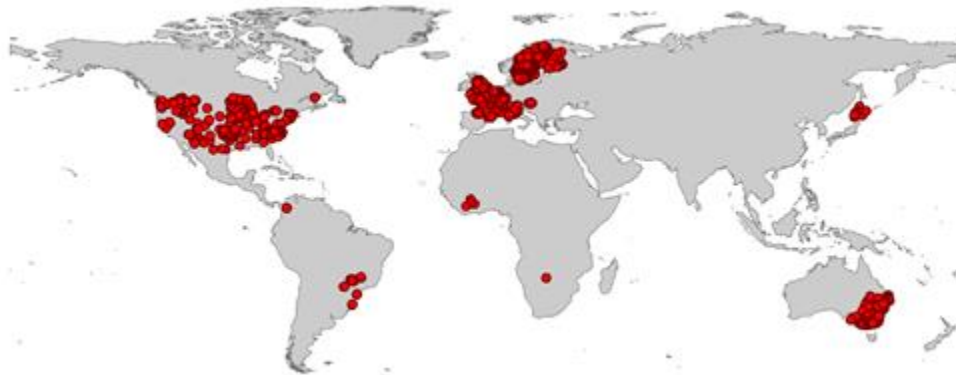

Fig. S10 Data locations of RivFishTIME dataset

## Reference

Abell, R., Thieme, M. L., Revenga, C., Bryer, M., Kottelat, M., Bogutskaya, N., Coad, B., Mandrak, N., Balderas, S. C., Bussing, W., Stiassny, M. L. J., Skelton, P., Allen, G. R., Unmack, P., Naseka, A., Ng, R., Sindorf, N., Robertson, J., Armijo, E., Higgins, J. V., Heibel, T. J., Wikramanayake, E., Olson, D., López, H. L., Reis, R. E., Lundberg, J. G., Sabaj Pérez, M. H., and Petry, P.: Freshwater Ecoregions of the World: A New Map of Biogeographic Units for Freshwater Biodiversity Conservation, *BioScience*, 58, 403–414, <https://doi.org/10.1641/B580507>, 2008.



Bunn, S. E. and Arthington, A. H.: Basic Principles and Ecological Consequences of Altered Flow Regimes for Aquatic Biodiversity, *Environmental Management*, 30, 492–507, <https://doi.org/10.1007/s00267-002-2737-0>, 2002.

Comte, L., Carvajal-Quintero, J., Tedesco, P. A., Giam, X., Brose, U., Erős, T., Filipe, A. F., Fortin, M.-J., Irving, K., Jacquet, C., Larsen, S., Sharma, S., Ruhi, A., Becker, F. G., Casatti, L., Castaldelli, G., Dala-Corte, R. B., Davenport, S. R., Franssen, N. R., García-Berthou, E., Gavioli, A., Gido, K. B., Jimenez-Segura, L., Leitão, R. P., McLarney, B., Meador, J., Milardi, M., Moffatt, D. B., Occhi, T. V. T., Pompeu, P. S., Propst, D. L., Pyron, M., Salvador, G. N., Stefferud, J. A., Sutela, T., Taylor, C., Terui, A., Urabe, H., Vehanen, T., Vitule, J. R. S., Zeni, J. O., and Olden, J. D.: RivFishTIME: A global database of fish time-series to study global change ecology in riverine systems, 30, 38–50, <https://doi.org/10.1111/geb.13210>, 2021.

The Inter-Sectoral Impact Model Intercomparison Project: <https://www.isimip.org/>, last access: 28 February 2020.

Kendy, E., Apse, C., and Blann, K.: A practical guide to environmental flows for policy and planning, 2012.

Lehner, B. and Grill, G.: Global river hydrography and network routing: baseline data and new approaches to study the world's large river systems, 27, 2171–2186, 2013.

Leigh, C. and Datry, T.: Drying as a primary hydrological determinant of biodiversity in river systems: A broad-scale analysis, 40, 487–499, 2017.

Mathers, K. L., Stubbington, R., Leeming, D., Westwood, C., and England, J.: Structural and functional responses of macroinvertebrate assemblages to long-term flow variability at perennial and nonperennial sites, 12, e2112, 2019.

Pastor, A. V., Ludwig, F., Biemans, H., Hoff, H., and Kabat, P.: Accounting for environmental flow requirements in global water assessments, 18, 5041–5059, 2014.

Sarremejane, R., England, J., Sefton, C. E., Parry, S., Eastman, M., and Stubbington, R.: Local and regional drivers influence how aquatic community diversity, resistance and resilience vary in response to drying, 129, 1877–1890, 2020.

Smakhtin, V., Revenga, C., and Döll, P.: A pilot global assessment of environmental water requirements and scarcity, 29, 307–317, 2004.

Su, G., Logez, M., Xu, J., Tao, S., Villéger, S., and Brosse, S.: Human impacts on global freshwater fish biodiversity, 371, 835–838, 2021.

Tedesco, P. A., Beauchard, O., Bigorne, R., Blanchet, S., Buisson, L., Conti, L., Cornu, J.-F., Dias, M. S., Grenouillet, G., and Hugueny, B.: A global database on freshwater fish species occurrence in drainage basins, 4, 1–6, 2017.

Tennant, D. L.: Instream flow regimens for fish, wildlife, recreation and related environmental resources, 1, 6–10, 1976.

Tessmann, S. A.: Environmental use sector: reconnaissance elements of the western Dakotas region of South Dakota study, Water Resources Institute, South Dakota State University, 1979.

Virkki, V., Alanära, E., Porkka, M., Ahopelto, L., Gleeson, T., Mohan, C., Wang-Erlandsson, L., Flörke, M., Gerten, D., and Gosling, S. N.: Environmental flow envelopes: quantifying global, ecosystem-threatening streamflow alterations, 1–31, 2022.

Zeiringer, B., Seliger, C., Greimel, F., and Schmutz, S.: River hydrology, flow alteration, and environmental flow, in: Riverine ecosystem management, Springer, Cham, 67–89, 2018.
